# Supplementary material
Source: publisher site journal article supplement (https://www.dovepress.com/article/396347)
Supplement: Supplementary file 1 [file get_supplementary_file.php]

**SUPPLEMENTARY MATERIALS**

**Patient willingness to use Digital Health Technologies and importance of measurements: Results of a Quantitative and Qualitative survey in patients with Cancer Cachexia**

Anil Tarachandani1, F. Isik Karahanoglu1, Andrew Messere1, Lisa Tarasenko2, Ann-Marie LaRonde-Richard3, Nancy Kessler4, Michelle Rossulek3, Hans Plate5, Kim Mahoney5 and Mar Santamaria1

1Early Clinical Development, Pfizer Inc., Cambridge MA

2Global Medical Affairs, Pfizer Inc., New York NY

3Internal Medicine Research Unit, Pfizer Inc., Cambridge MA

4Business Analytics and Insights, Pfizer Inc., New York NY

5Pensari LLC, Baltimore, MD

**Table of Contents**

[**Supplementary Material 1. Online survey** 3](#_Toc110605915)

[**Supplementary Material 2. Discussion guide for the online interviews with selected patients.** 14](#_Toc110605916)

[**Supplementary Table 1. Selected quotes from patients.** 18](#_Toc110605917)

[**Supplementary Figure 1. Distribution of rating of the impact of weight loss on daily activities.** 21](#_Toc110605918)

[**Supplementary Figure 2. Distribution of meaningfulness of improvements to daily activities desired.** 21](#_Toc110605919)

# **Supplementary Material 1. Online survey**

October 2020

**Cachexia Wearables Survey**

**Quotas:**

| **Cancer Type** | **Sample Size** |
| --- | --- |
| Non-small cell lung cancer | Min 10; Max 15 |
| Liver cancer | Min 1; Max 2 |
| Ovarian cancer | Min 6; Max 12 |
| Prostate cancer | Min 1; Max 2 |
| Colorectal cancer | Min 11; Max 16 |
| Pancreatic cancer | Min 1; Max 3 |
| **Total** | Min 30; Max 50 |

**S. Screener**

Today we are conducting a healthcare market research study on a treatment for conditions associated with cancer. This study is for **research purposes only**. The information you provide to us is strictly confidential – neither your name, title, nor organization will be reported or passed on to any third party. You will never be asked to purchase or recommend any product or service, and no one will contact you for any sales-related activity as a result of your participation.

1. May we continue?
   1. Yes
   2. No ® Disqualify immediately

This research is conducted for the benefit of a pharmaceutical company. The pharmaceutical company will not have access to any personal data associated with your responses. The pharmaceutical company will only receive aggregated results which will not identify you and will not be used to support measures or decisions regarding you. In very limited circumstances, we are obligated to disclose personal data associated with any report of adverse events mentioned by you during the interview to the pharmaceutical company, which will only use your personal data to comply with its own legal obligations.

We are obligated to disclose to the pharmaceutical company sponsoring this study any adverse events that are reported about a product they make (e.g., undesirable change of health, side effects during treatment, lack of effectiveness, etc.) so that they can report this to the regulatory authorities**.** If you do mention a drug-related adverse event, we will request to disclose your name and contact information to the research sponsor who would use it only for the purpose of complying with their obligations; no personally identifying information about a patient will be solicited or reported if disclosed. You also have the right to “opt out” of sharing your contact information without any consequence.

1. Are you, or is anyone in your immediate family, affiliated with or employed by the following?
   1. An advertising agency in the healthcare area ® Disqualify immediately
   2. A healthcare marketing or market research firm, or in the market research department of a healthcare company ® Disqualify immediately
   3. A manufacturer or distributor of pharmaceutical devices, medications, or drug delivery devices (excluding advisory boards or as a temporary consultant) ® Disqualify immediately
   4. Neither myself nor anyone in my family is affiliated with any of the organizations above
2. What type(s) of cancer have you been told by a doctor that you have?
   1. Breast
   2. Colorectal
   3. Kidney / renal ® Disqualify unless also have qualifying cancer type
   4. Leukemia ® Disqualify unless also have qualifying cancer type
   5. Liver
   6. Lung
   7. Lymphoma ® Disqualify unless also have qualifying cancer type
   8. Ovarian
   9. Pancreatic
   10. Prostate
   11. Rectal ® Disqualify unless also have qualifying cancer type
   12. Thyroid ® Disqualify unless also have qualifying cancer type
   13. Other add Specify ® Disqualify unless also have qualifying cancer type
3. What type of lung cancer do youhave?
4. Non-small cell lung cancer
5. Small cell lung cancer ® Disqualify unless also have qualifying cancer type
6. Have you experienced weight loss in the past **two years** not due to diet or exercise changes or other efforts to lose weight?
7. Yes
8. No ® Disqualify
9. What wasyourtypicalweight before youwere first diagnosed with cancer?

_____ pounds [range: 50-600; if >300, Disqualify immediately]

[SHOW S7-10 ON SAME SCREEN]

1. What has been your lowest weight within the past two years?

_____ pounds [range: 50-600; if >300, Disqualify immediately]

1. In what month and year did you experience this lowest weight?

_____ year

1. What was your approximate weight 6 months prior to your lowest weight?

_____ pounds [range: 50-600]

1. With which type of cancer do you most associate this lowest weight? (Language that might be most appropriate: “Associate with your experience of weight loss”)
   1. Breast
   2. Colorectal
   3. Liver
   4. Non-Small Cell Lung
   5. Ovarian
   6. Pancreatic
   7. Prostate
   8. Other **specify** ® Disqualify

[Classify quota based on this response]

1. What is yourcurrent weight?

_____ pounds [range: 50-600]

1. What is yourheight?
2. _____ feet
3. _____ inches

[Confirm that BMI is calculated to at least one decimal place]

[Hidden variable:] Insert BMI calculator & calculate hidden variables: Starting BMI and Current BMI
____ Starting BMI (based on S6 & S11/12)

____ Lowest BMI (based on S7 & S11/12)
____ Current BMI (based on S12 & S11)

If lowest BMI is greater than or equal to starting BMI, disqualify immediately

Programmers: CALCULATION 1
X= (S6-S7)/S6 ® Patient qualifies if lowest BMI<20 and X>2%

Programmers: CALCULATION 2

Y= (S9-S7)/S9 ® Patient qualifies if Y>5%

The purpose of this study is **to understand details around patient use of digital devices in clinical trials**.

1. How would you describe your overall level of willingness to wear a digital device (i.e., wrist, waistband) during a clinical trial to capture your movement and activity?

*The device would NOT include GPS, and therefore, would not track your location.*

| 1  Not at all Willing | 2  Slightly Willing | 3  Somewhat Willing | 4  Very  Willing | 5  Extremely Willing |
| --- | --- | --- | --- | --- |
| ○ | ○ | ○ | ○ | ○ |

[Go to S14 if 1-2, others skip to end of screener]

1. Why are you not willing to wear a digital device? [open ended; disqualify if S13=1]

**If respondent does not qualify – Terminate**

Sorry, but you do not meet one or more of the criteria for inclusion in this study. Thank you for your time.

**If respondent qualifies**

[Check quotas and if not full, continue]

1. Please read the following terms, and then check “agree” or “disagree”.

This survey is for market research purposes only. The purpose of this statement is to inform respondents of the intent of the study and to assure you that we are looking for opinions only. During the survey, you will be presented with information about potential new products for unintended weight loss associated with cancer. By participating in the study, you hereby agree to keep all information about this research and its contents completely confidential, and further agree to not disclose such information to any other party, nor attempt to copy, print, or download any of this information. **(Select one.)**

- 1. Agree
  2. Disagree ® Disqualify

Congratulations, you qualify for inclusion in this study. Please keep in mind that this survey is for market research purposes only.

*We appreciate you taking the time to participate in this important research. Your input is very important to us, so please take your time in completing the survey as thoughtfully as possible. Your responses will be kept confidential, meaning that you will not be identified. Thank you for your time and participation.*

**A. Cancer Background**

First, we would like to ask a few questions about your cancer experience.

1. Which of the following treatments have you **ever** used for your cancer? (Select all that apply.)
2. Oral prescription medications
3. IV chemotherapy
4. Oral chemotherapy
5. Radiation therapy
6. Steroids
7. Vitamins
8. Surgery
9. Did your doctor or other member of your healthcare team prescribe any interventions (medications or nutritional supplements) specifically to address yourweight loss?
10. Yes
11. No
12. What did your healthcare provider prescribe? (Select all that apply.)
13. Nutritional supplement such as Ensure® or Boost®, Nepro®, Suplena®
14. Megace® (megestrol)
15. Marinol® (dronabinal)
16. Oxandrin® (oxandrolone)
17. Periactin (cyproheptadine)
18. Vitamin supplements
19. Medical marijuana
20. None of the above
21. Which of the following best describes your current abilities to perform daily activities?
22. I amfully active, able to carry on all my normal pre-cancer activities without any restrictions.
23. I amrestricted in physically demanding activities, but I can walk and carry out less physically demanding activities, such as light housework, grocery shopping, or office work.
24. I amable to walk, and I am capable of taking care of my basic needs such as getting dressed and taking a shower, but I amunable to work or carry out most daily activities, such as light housework or grocery shopping. I amup and about more than 50% of my waking hours.
25. While I cantake care of some of my basic needs, Ineed help with many. I amconfined to bed or a chair more than 50% of my waking hours.
26. I amdependent on others’ help to take care of my basic needs such as getting dressed and taking a shower. I amtotally confined to bed or a chair during my waking hours.
27. [Ask if A4=2-5] How consistent is the impact of your weight loss on your activities of daily living?
28. My activities are/were limited all of the time
29. My activities are/were limited for a specific period of time after taking my cancer medication
30. My activities are/were limited only at certain times of day or night
31. My activities are/were limited only occasionally
32. Which of the following activities are **most impacted** by your weight loss? [Programmers, insert 100-point sliding bar with “Not at all impacted” at one end, and “Extremely impacted” at the other end. Show “Slightly impacted” 1/5 of way through, “Somewhat impacted” 3/5 of way through, and “Very impacted” 4/5 of way through.]
33. How fast you can walk (speed)
34. How much you walk per day (time)
35. How far you walk (distance)
36. How you are walking (longer or shorter steps, wobbling, balance, etc.)
37. How you are sleeping (time you spend sleeping, number of times you wake up at night, how quickly you fall asleep or wake up)
38. How active you are during the day
39. How sedentary you are during the day
40. How much you transition from sitting/standing and how you are doing it (e.g., balance, speed, timing)

**B. Wearable Reaction**

Now, we would like to discuss with you a trial of a potential new treatment for cancer cachexia. As part of the trial, the manufacturers would like to measure the impact of the treatment on activity.

[SHOW WEARABLE DESCRIPTION AND QUESTION B1 ON SAME SCREEN]

1. How clear are the instructions in each of the following sections above?
2. Section 1: What is an accelerometry sensor?
3. Section 2: When do I have to wear the sensors?
4. Section 3: Wearing wrist sensor
5. Section 4: Wearing Lumbar sensor
6. Section 5: Sensor Information
7. Section 6: Important

| 1  Not at all Clear | 2  Slightly Clear | 3  Somewhat Clear | 4  Very  Clear | 5  Extremely Clear |
| --- | --- | --- | --- | --- |
| ○ | ○ | ○ | ○ | ○ |

1. There are different types of data that digital devices can capture. If you could wear a device that captures your movement and activity, which data would be **most meaningful** to you personally?

[Programmers, insert 100-point sliding bar with “Not at all meaningful” at one end, and “Extremely meaningful” at the other end. Show “Slightly meaningful” 1/5 of way through, “Somewhat meaningful” 3/5 of way through, and “Very meaningful” 4/5 of way through.]

1. How fast you can walk (speed)
2. How much you walk per day (time)
3. How far you walk (distance)
4. How you are walking (longer or shorter steps, wobbling, balance, etc.)
5. How you are sleeping (time you spend sleeping, number of times you wake up at night, how quickly you fall asleep or wake up)
6. How active you are during the day
7. How sedentary you are during the day
8. How much you transition from sitting/standing and how you are doing it (e.g., balance, speed, timing)
9. Other (please explain)

[Randomize order]

1. What **level of improvement** would be meaningful for these activities? [Insert activities with rating of 80+ points in B2; Programmers, insert 100-point sliding bar with “Slight improvement” at one end and “Extreme improvement” at the other end. Midpoints should be: “Moderate improvement”]
2. Please select and rank **the top three activities** in terms of how much improving them would influence your overall quality of life.
3. How fast you can walk (speed)
4. How much you walk per day (time)
5. How far you walk (distance)
6. How you are walking (longer or shorter steps, wobbling, balance, etc.)
7. How you are sleeping (time you spend sleeping, number of times you wake up at night, how quickly you fall asleep or wake up)
8. How active you are during the day
9. How sedentary you are during the day
10. How much you transition from sitting/standing and how you are doing it (e.g., balance, speed, timing)
11. Other (please explain)

[Randomize order]

1. **Where** on your body would you prefer to wear a digital device? [Programmers, insert 100-point sliding bar with “Not at all preferred” at one end, and “Extremely preferred” at the other end. Show “Slightly preferred” 1/5 of way through, “Somewhat preferred” 3/5 of way through, and “Very preferred” 4/5 of way through.]
   1. Wrist
   2. Waist
   3. Head
   4. Ankle
   5. Neck
   6. Chest
   7. Thigh
   8. Arm
   9. Other (please explain)

[Randomize order]

1. If you are willing and able to wear a device on your wrist, similar to a watch, what is the **maximum** number of days you would be willing to wear it continuously for 24 hours?

Please note, the device will tell us how active you are during the day and how much you are sleeping.

*As a reminder, the device would NOT include GPS, and therefore would not track your location.*

1. Less than 1 day
2. 1 to 4 days
3. 5 to 8 days
4. 9 to 12 days
5. 13 to 16 days
6. 17 to 20 days
7. 21 days or longer
8. If you are willing and able to wear a device around your waist, similar to a belt, what is the **maximum** number of days you be willing to wear it during the daytime (taken off for bedtime at night)?

Please note, the device will tell us about your walking and gait characteristics.

*As a reminder, the device would NOT include GPS, and therefore would not track your location.*

1. Less than 1 day
2. 1 to 4 days
3. 5 to 8 days
4. 9 to 12 days
5. 13 to 16 days
6. 17 to 20 days
7. 21 days or longer
8. If the device could monitor changes in your physical function, would you want your **doctor** to have access to the data?
9. Yes
10. No
11. If the device could monitor changes in your physical function, would you be willing to wear it during your entire treatment period (e.g., throughout the course of your chemotherapy treatment)?
12. Yes
13. No
14. While using a digital device, you may be asked to log details in a “diary” app about your hourly activities during the day (e.g., 9-10 am eating breakfast, 10-11 am commuting, etc.). If the logging would take place for up to four days at a time, with what frequency would you be willing to fill out hourly details about your activity using an app?
15. Every 1 hour (i.e., report each hour throughout the day)
16. Every 3 hours (i.e., report past 3 hours of activity every 3 hours)
17. Every 6 hours (i.e., report past 6 hours of activity every 6 hours)
18. Every 12 hours (i.e., report past 12 hours of activity every 12 hours)
19. Every 24 hours (i.e., report past 24 hours of activity each day)
20. Not at all
21. Which of these activities would be **most meaningful** for you to perform on a regular basis? [Programmers, insert 100-point sliding bar with “Not at all meaningful” at one end, and “Extremely meaningful” at the other end. Show “Slightly meaningful” 1/5 of way through, “Somewhat meaningful” 3/5 of way through, and “Very meaningful” 4/5 of way through.]
22. Vigorous activity (e.g., running)
23. Moderate activity (e.g., going for a walk at a normal pace)
24. Light activity (e.g., washing dishes)
25. Sedentary activity (e.g., sitting and reading a book)
26. [If cancer type=NSCLC] Would you be willing to participate in a 45-minute web-based telephone follow-up interview to further discuss this topic?
27. Yes ® Show qualitative times for scheduling
28. No ® Thank and close
29. What activities did you enjoy most prior to your weight loss that you are/were restricted in doing after losing the weight? [OE; none]
30. Do you have other feedback to share as it relates to measuring activity in a clinical trial for people with cancer and unintended weight loss? [Yes OE; No]
31. How clear were the questions we asked you in this survey?

| 1  Not at all Clear | 2  Slightly Clear | 3  Somewhat Clear | 4  Very  Clear | 5  Extremely Clear |
| --- | --- | --- | --- | --- |
| ○ | ○ | ○ | ○ | ○ |

**[You have completed the survey. Thank you for your participation in this study.]**

**Additional Question:**

Is there anything else that you think would be important to ask? [Yes Open-ended; No]

# **Supplementary Material 2. Discussion guide for the online interviews with selected patients.**

**Cachexia Wearables Qualitative Interviews**

– Discussion Guide –

1. **Background**
   1. Orientation and housekeeping items – recording, observation, confidentiality
      1. Be assured that the information you provide to us and your responses will be used for market research purposes only and will not be passed on to any other party for any purpose other than that for which it was intended. The interview will be recorded for note-taking purposes and only shared with the client and their interested parties which have been commissioned to carry out this research.
   2. Purpose of study – follow-up on survey responses to better understand use of wearable digital devices
   3. Client participation – manufacturer staff will be on the line
   4. Adverse Events Reporting:
      1. *This research is conducted for the benefit of a pharmaceutical company. The pharmaceutical company will not have access to any personal data associated with your responses. The pharmaceutical company will only receive aggregated results which will not identify you and will not be used to support measures or decisions regarding you. In very limited circumstances, when you mention an adverse event during the interview, we are obligated to disclose personal data associated with that report of adverse events mentioned by you to the pharmaceutical company, which will only use your personal data to comply with its own legal obligations.*
      2. *We are obligated to disclose to the pharmaceutical company sponsoring this study any adverse events that are reported about products they make, such as side effects or lack of effectiveness****.*** *If you do mention a drug-related adverse event during our conversation, we will request to disclose your name and contact information to the research sponsor who would use it ONLY for the purpose of complying with their obligations to the regulatory authorities. You also have the right to “opt out” of sharing your contact information. In such a situation you will be asked whether or not you are willing to waive the confidentiality given to you under the Market Research Codes of Conduct specifically in relation to that adverse event. If you opt out, your name and other uniquely identifying information will not be shared or associated with your adverse event responses to the pharmaceutical company. Everything else you say during the course of the interview/survey will continue to remain confidential, and you will still have the option to remain anonymous if you so wish.*

**Wearables Use**

You recently completed a brief survey for us on wearing digital devices during a clinical trial for a treatment for unintended weight loss associated with cancer. We would like to ask you some follow-up questions on this topic.

- 1. First, tell me a little bit about yourself, your cancer diagnosis, and your weight loss.
     1. How has your unintended weight loss made you feel? How has it impacted your life?
        1. How active are you during a typical day? To what extent does this differ from before your weight loss?
           1. What are the things you find yourself unable to do because of your weight loss? [Reference survey responses from B13 open ended]
        2. What daily activities are most important for you to perform? [Reference survey responses from populated list for B2 of measures for digital device] Why those?
           1. You indicated it is most important for you to perform [B11 response (how vigorous)] activities on a regular basis. Why is that?
           2. You indicated you would want to see [insert B3 (level of improvement)] improvement in [insert activity]. Tell me a little bit about why that level of improvement is meaningful. [Repeat question for most and least meaningful activities or any surprising results]
           3. Improvement in what types of daily activities would most impact your quality of life? [Reference survey responses from populated list for B4 for most impact QOL] Why those?
        3. How often do you feel fatigue due to your unintended weight loss?
           1. What types of activities make you feel fatigued?

[Reference survey list B2 for measurements] What do you feel would be a meaningful measurement of improvement in fatigue (e.g., decrease in fatigue) using a wearable digital device?

- - - 1. To what extent has your unintended weight loss impacted your sleep?
         1. If impacted, in what ways? *Probe: trouble falling asleep, staying asleep, feeling tired despite sleep*

How much does your activity level in a given day impact your sleep that night?

[Reference survey list B2 for measurements] What do you feel would be a meaningful measurement of *improved* sleepusing a wearable digital device?

- - 1. We asked you several questions about wearing a digital device on different locations of your body. Let’s first focus on a device that would be on your wrist.
       1. You indicated this location was [insert response for B5 (how preferred locations are)] preferred. Why do you say that? How would you feel about wearing a wrist sensor?
          1. Do you already wear a watch? On which wrist? Are you left- or right-handed?

How would you feel if you had to move your watch to appropriately wear the wrist sensor?

- - - 1. We also asked you about how long you would be willing to wear a wrist sensor consecutively. You said [insert B6 response (length of wrist wearing)]. Tell me about why you answered that period of time. What prevents this from being longer?
      2. I have a sample wrist sensor with me [Show on webcam]. It is about the size of an Apple watch and is adjustable in size. What questions would you have about this device?
         1. What **physical** concerns do you have with wearing a wrist sensor, if any?

Do you anticipate you would put the wrist sensor on yourself or with the help of someone else?

- - - - 1. What **logistical** concerns do you have about wearing a wrist sensor, if any?

Probe: any activities that would prevent you from wearing it?

- - 1. We asked you about wearing a sensor on your waist in the survey as well.
       1. You indicated this location was [insert response for B5 (how preferred locations are)] preferred. Why do you say that? How would you feel about wearing a waist sensor?
       2. We also asked you about how long you would be willing to wear a waist sensor consecutively. You said [insert B7 response (length of waist wearing)]. Tell me about why you answered that period of time. What prevents this from being longer?
       3. I also have a sample waist sensor with me [Show on webcam]. It is the same size as the wrist sensor with a stretchy, adjustable waistband. What questions would you have about this device?
          1. What **physical** concerns do you have with wearing a waist sensor, if any?

Do you anticipate you would put the waist sensor on yourself or with the help of someone else?

- - - - 1. What **logistical** concerns do you have about wearing a waist sensor, if any?

Probe: any activities that would prevent you from wearing it?

- - 1. [If responses for B6/7 and B9 (willing to wear for entire treatment period) seem to conflict:] We asked you if you would be willing to wear a digital device during your entire treatment period if it could monitor changes in your physical activity, but you answered with a shorter time for wearing a wrist or waist sensor. Tell me a little about the difference in these two situations.
    2. We asked you about completing a diary through an app about your activity during several different timeframes. The diary would need to capture activity hourly. You indicated you would enter the data into an app [insert response from B10 (diary data entry)]. Tell me about how you would fit this into your day.
       1. What would prevent you from entering the data more frequently throughout the day?
          1. [If entering data less frequently than every 3 hours] How would you remember your activities to enter them later?
    3. [Based on response from B8] Could you expand on your response, about why it would/wouldn’t be important for your physician to have access to your physical activity results? How might this inform the care your physician provides?
    4. Finally, is there anything else that you think would be important to ask?

1. **Wrap up**
   1. Questions from observers
   2. Thank and close

# **Supplementary Table 1. Selected quotes from patients.**

| Question | Answer |
| --- | --- |
| Weight loss impact | *“The further out I am from treatment, I feel like I am gaining more of myself back. I couldn’t even walk, going up stairs. I feel like coming back a little bit, have more energy. I can walk a little further than have been. I have to take it one day at a time.” –* Patient with ovarian cancer  *Just having a little more energy, always felt heavy, like carrying rocks around with me, less now. I am able to do things more quickly, efficiently. I am able to do more household chores, taking care of daughter. –* Patient with breast cancer |
| Desired improvement to activities | *“I was in the military for 25 years, so I had to stay in shape, but with getting cancer in 2016 I had a rapid decline in my ability to do meaningful tasks like walking long distances, carrying groceries, get winded.” –* Patient with colorectal cancer  *“I don’t feel fulfilled after my walk, instead I feel a little winded. I don’t feel like I worked out and I’m refreshed. My doctors say to keep moving to feel less fatigued. In my case it’s not helping my fatigue as much as I thought. My workouts used to be 3 hours, now they are 30 minutes.” –* Patient with ovarian cancer  *“I would like to be able to take [my granddaughter] to the park and play with her, not just sit. At Christmas I want to be able to take her to ride the Christmas train. Someone has to be with me because I’m too tired to play with her.” –* Patient with NSCLC |
| Activities enjoyed prior to weight loss* | *“Walking in charity events, doing more than 2 activities in a day, going shopping, working in the yard.” –* Patient with ovarian cancer  *“Walking to the end of my driveway every day to check my mail, going shopping with my family every month, throwing close family members birthday parties, i.e., shopping for the gifts and supplies along with decorating for the party. What I miss most is playing outside with my daughter.” –* Patient with NSCLC |
| Sleep disturbances | *“Nothing disrupts sleep more than waking up at night, and in pain so it takes a while to go back to sleep. Even if I sleep 8 hours, I don’t feel like slept well.” –* Patient with breast cancer  *“I go to sleep 10:30-11 pm, up at 1 am, and I throw in a load of laundry. Since diagnosis of cancer, I am up a couple of times in middle of the night.” –* Patient with colon cancer  *“Do cannabis oil, that helps with cancer and sleep. Take melatonin and then can sleep. Otherwise, not sleeping. Do acupuncture, red light therapy, all kinds of stuff. My days are spent trying to feel better.” –* Patient with ovarian cancer  *“I was never a great sleeper, but it’s the comfort level of sleeping now…I wake up if I roll over and my pillow is not between my knees. Sit leaning more towards one side even when watching TV. My hips or shoulders are always uncomfortable.” –* Patient with NSCLC  *“I average 8 hours at night, and also nap during the day because I tire easily. It’s a restless sleep. I toss and turn. It’s not a sound sleep.” –* Patient with NSCLC |
| Open ended question on additional considerations on weight loss | *The bottom line is that my mobility is affected more by my treatment than my weight.*  *Just follow doctor plan of care and also see a nutritionist.*  *I'm not trying to lose weight at all and I eat pretty well, I'm concerned that the weight will keep dropping and make me even weaker.*  *I am freezing during times I'm dropping weight.*  *It completely changed my life. I feel 20 years older than before the diagnosis. I no longer have the stamina to do things I enjoy. It is even exhausting being around groups of people.* |

*Answers taken from the quantitative survey.

# **Supplementary Figure 1. Distribution of rating of the impact of weight loss on daily activities.**

# **Supplementary Figure 2. Distribution of meaningful daily activities desired.**
